# Supplementary material
Source: PubMed Central journal article supplement (PMC4798231)
Supplement: NIHMS767294-supplement-Appendix_1.pdf [file NIHMS767294-supplement-Appendix_1.pdf]

## Pediatric Physical Function - Upper Extremity - Short Form

Please respond to each item by marking one box per row.

In the past 7 days.....

|                                                 | With no trouble               | With a little trouble         | With some trouble             | With a lot of trouble         | Not able to do                |
|-------------------------------------------------|-------------------------------|-------------------------------|-------------------------------|-------------------------------|-------------------------------|
| I could button my shirt or pants.               | <input type="checkbox"/><br>3 | <input type="checkbox"/><br>2 | <input type="checkbox"/><br>1 | <input type="checkbox"/><br>0 | <input type="checkbox"/><br>0 |
| I could open a jar by myself.                   | <input type="checkbox"/><br>4 | <input type="checkbox"/><br>3 | <input type="checkbox"/><br>2 | <input type="checkbox"/><br>1 | <input type="checkbox"/><br>0 |
| I could open the rings in school binders.       | <input type="checkbox"/><br>4 | <input type="checkbox"/><br>3 | <input type="checkbox"/><br>2 | <input type="checkbox"/><br>1 | <input type="checkbox"/><br>0 |
| I could pour a drink from a full pitcher.       | <input type="checkbox"/><br>4 | <input type="checkbox"/><br>3 | <input type="checkbox"/><br>2 | <input type="checkbox"/><br>1 | <input type="checkbox"/><br>0 |
| I could pull a shirt on over my head by myself. | <input type="checkbox"/><br>3 | <input type="checkbox"/><br>2 | <input type="checkbox"/><br>1 | <input type="checkbox"/><br>0 | <input type="checkbox"/><br>0 |
| I could pull open heavy doors.                  | <input type="checkbox"/><br>4 | <input type="checkbox"/><br>3 | <input type="checkbox"/><br>2 | <input type="checkbox"/><br>1 | <input type="checkbox"/><br>0 |
| I could put on my shoes by myself.              | <input type="checkbox"/><br>4 | <input type="checkbox"/><br>3 | <input type="checkbox"/><br>2 | <input type="checkbox"/><br>1 | <input type="checkbox"/><br>0 |
| I could use a key to unlock a door.             | <input type="checkbox"/><br>4 | <input type="checkbox"/><br>3 | <input type="checkbox"/><br>2 | <input type="checkbox"/><br>1 | <input type="checkbox"/><br>0 |
